# Supplementary material for: ‘More stressful than cancer’: Treatment Experiences Lived During Hurricane Maria among Breast and Colorectal Cancer Patients in Puerto Rico
Source: Research Square preprint supplement (doi:10.21203/rs.3.rs-2689228/v1), 2023-04-03
Supplement: Supplementary file 1 [file b718a4dcc2a509ea088a1edd.pdf]

*Supplementary Table 1. Quotes from Focus Groups Conducted in Puerto Rico with Breast and Colorectal Cancer Patients*

| <b>Theme</b>               | <b>Example Quote</b>                                                                                                                                                                                                                                                                                                                                                                                                                                                                                                                                                                                                                                                                                                                                                                                                                                                   | <b>Group</b> |
|----------------------------|------------------------------------------------------------------------------------------------------------------------------------------------------------------------------------------------------------------------------------------------------------------------------------------------------------------------------------------------------------------------------------------------------------------------------------------------------------------------------------------------------------------------------------------------------------------------------------------------------------------------------------------------------------------------------------------------------------------------------------------------------------------------------------------------------------------------------------------------------------------------|--------------|
| Barriers-Basic Services    | In terms of treatment, as I did not have an appointment yet, I did not have an appointment for Radiotherapy, just had to wait until everything (the aftermath of the hurricane), and for the electricity to come back, to coordinate the appointment, and that's why I started (the treatment) in January.                                                                                                                                                                                                                                                                                                                                                                                                                                                                                                                                                             | BC           |
|                            | I did not want the surgery because of my maintenance, the water, and electricity...                                                                                                                                                                                                                                                                                                                                                                                                                                                                                                                                                                                                                                                                                                                                                                                    | BC           |
|                            | The governor had given an order for there to be no cuts until after the water and electricity were reestablished, but they cut my water supply.                                                                                                                                                                                                                                                                                                                                                                                                                                                                                                                                                                                                                                                                                                                        | CRC          |
| Barriers-Health facilities | Since there was no electricity, the hospital started almost a month (later), a month or more, two months.                                                                                                                                                                                                                                                                                                                                                                                                                                                                                                                                                                                                                                                                                                                                                              | CRC          |
|                            | What happened is that I came from (a faraway city) and when I arrived, the generator had collapsed, and they couldn't give me the service. But come tomorrow, and I continued taking it (the treatment). The treatment was interrupted like that for days, but I persisted and finished.                                                                                                                                                                                                                                                                                                                                                                                                                                                                                                                                                                               | CRC          |
|                            | You know, after those two weeks I came back (to the physician's office), and there was no electricity.                                                                                                                                                                                                                                                                                                                                                                                                                                                                                                                                                                                                                                                                                                                                                                 | CRC          |
| Barriers-Communication     | There were no phones. Just a note (at the physician's office), and we later came back.                                                                                                                                                                                                                                                                                                                                                                                                                                                                                                                                                                                                                                                                                                                                                                                 | CRC          |
|                            | But there were no phones, nobody had phones and then when it was time, two weeks after, I went (to the physician's office), and there was no electricity.                                                                                                                                                                                                                                                                                                                                                                                                                                                                                                                                                                                                                                                                                                              | CRC          |
| Facilitator-Social Support | My sister had a generator she just took my insulin and put it in the refrigerator, and I stayed with the one I was using at the moment.                                                                                                                                                                                                                                                                                                                                                                                                                                                                                                                                                                                                                                                                                                                                | BC           |
|                            | My family helped; my daughters helped me.                                                                                                                                                                                                                                                                                                                                                                                                                                                                                                                                                                                                                                                                                                                                                                                                                              | CRC          |
|                            | My neighbor had a generator and he gave me (electricity)...                                                                                                                                                                                                                                                                                                                                                                                                                                                                                                                                                                                                                                                                                                                                                                                                            | BC           |
|                            | My sons and my siblings put on the storm rails in the house, helped me get prepared, I have a generator                                                                                                                                                                                                                                                                                                                                                                                                                                                                                                                                                                                                                                                                                                                                                                | CRC          |
| Treatment experiences      | Well, then they put it (treatment) on the 19 <sup>th</sup> (September), they told me that they were going to give me a special chemotherapy. They did not put me the little bag, instead they put me a chemotherapy. Which one they gave me? I did not know what it was, but it was for not having to use the little bag because they were not going to be there. Oh my God! For what it was, I almost died! Well I saw the hurricane passing by and I was awake all the time, but believe me after it, it was horrible because not having the little bag and had a stronger chemo, my body was a bit disturb and it was worse. And that is what they told me, the excuse they gave me was that they were giving me a stronger one (chemotherapy) because they don't know what was going to happen and they don't know if they were going to be there (at the office). | CRC          |
|                            | And then I don't have the catastrophic (medical insurance special coverage) and I said well I'm going to the doctor. I did not even have been flushed (the chemo port) because I disliked the fact that, as I told my offspring, I already took my 12 chemotherapies and this is a problem every time you have to go there in the aspect of getting the deductible, getting this, getting that and having to wait all that time because after one is going through that process (cancer treatment) the people sometimes have no compassion for us.                                                                                                                                                                                                                                                                                                                     | CRC          |
|                            | On September was the hurricane, I had my treatment the day before the hurricane and the on October, I started again because I am insistent.                                                                                                                                                                                                                                                                                                                                                                                                                                                                                                                                                                                                                                                                                                                            | BC           |
|                            | They lowered my immunosuppressants to let the body fight cancer and not affecting my only kidney. I was fighting between both of them (cancer and not having a kidney).                                                                                                                                                                                                                                                                                                                                                                                                                                                                                                                                                                                                                                                                                                | BC           |
|                            | When I had the genetic diagnostic, you know in terms of costs, I spent more than ten thousand dollars, without any help, only on the genetic tests. The genetic labs, it was like 18 blood samples and it was \$700. And it was all from my pocket (own money)                                                                                                                                                                                                                                                                                                                                                                                                                                                                                                                                                                                                         | BC           |
